# Supplementary material
Source: PubMed Central journal article supplement (PMC5407718)
Supplement: ASN.2016030336SupplementaryData.pdf [file ASN.2016030336SupplementaryData.pdf]

## Clot structure is a predictor of mortality in hemodialysis patients

Supplemental Data

**Supplementary table 1. Mortality (all-cause and cardiovascular) according to clot density (higher vs. lower clot density) with adjustment for parameters from table 1.**

| VARIABLE                               | All-cause mortality |           |         | Cardiovascular mortality |           |         |
|----------------------------------------|---------------------|-----------|---------|--------------------------|-----------|---------|
|                                        | Hazard ratio        | 95% CI    | P value | Hazard ratio             | 95% CI    | P value |
| <b>FT<math>\geq</math>0.32</b>         |                     |           |         |                          |           |         |
| Crude (FT $\geq$ 0.32)                 | 2.54                | 1.31-4.91 | 0.006   | 3.02                     | 1.39-6.53 | 0.005   |
| FT $\geq$ 0.32 plus covariates         |                     |           |         |                          |           |         |
| Gender (m/f)                           | 2.53                | 1.31-4.89 | 0.006   | 3.01                     | 1.39-6.52 | 0.005   |
| Age (years)                            | 2.33                | 1.20-4.52 | 0.012   | 2.74                     | 1.26-5.95 | 0.011   |
| Dialysis vintage (years)               | 2.47                | 1.27-4.81 | 0.008   | 2.93                     | 1.34-6.40 | 0.007   |
| Diabetes                               | 2.55                | 1.32-4.94 | 0.005   | 3.01                     | 1.39-6.53 | 0.005   |
| Smoking                                | 2.51                | 1.30-4.85 | 0.006   | 3.00                     | 1.38-6.48 | 0.005   |
| Ischemic heart disease                 | 2.59                | 1.34-5.02 | 0.005   | 3.06                     | 1.41-6.63 | 0.005   |
| Peripheral artery disease              | 2.46                | 1.26-4.78 | 0.008   | 2.85                     | 1.30-6.21 | 0.009   |
| Congestive heart failure               | 2.55                | 1.32-4.93 | 0.005   | 3.01                     | 1.39-6.52 | 0.005   |
| Access thrombosis                      | 2.73                | 1.39-5.38 | 0.004   | 3.39                     | 1.51-7.58 | 0.003   |
| Access (fistula vs. graft)             | 2.53                | 1.30-4.90 | 0.006   | 3.03                     | 1.40-6.57 | 0.005   |
| <b>Blood pressure</b>                  |                     |           |         |                          |           |         |
| Systolic BP (mmHg)                     | 2.51                | 1.29-4.84 | 0.006   | 2.98                     | 1.38-6.45 | 0.006   |
| Diastolic BP(mmHg)                     | 2.48                | 1.28-4.79 | 0.007   | 2.96                     | 1.37-6.42 | 0.006   |
| <b>Anthropometrics</b>                 |                     |           |         |                          |           |         |
| BMI (kg/m <sup>2</sup> )               | 2.50                | 1.29-4.82 | 0.006   | 2.99                     | 1.38-6.48 | 0.005   |
| <b>Dialysis parameters</b>             |                     |           |         |                          |           |         |
| Kt/V                                   | 2.48                | 1.28-4.79 | 0.007   | 2.93                     | 1.35-6.35 | 0.006   |
| <b>Laboratory variables</b>            |                     |           |         |                          |           |         |
| Protein (g/l)                          | 2.54                | 1.31-4.92 | 0.006   | 3.02                     | 1.40-6.54 | 0.005   |
| Hemoglobin (g/dl)                      | 2.68                | 1.38-5.19 | 0.003   | 3.18                     | 1.47-6.91 | 0.003   |
| CRP (nmol/l)                           | 2.25                | 1.16-4.35 | 0.016   | 2.65                     | 1.22-5.75 | 0.014   |
| C3 (g/l)                               | 2.48                | 1.26-4.88 | 0.008   | 3.06                     | 1.39-6.73 | 0.006   |
| Fibrinogen ( $\mu$ mol/l)              | 2.68                | 1.29-5.57 | 0.008   | 3.31                     | 1.41-7.79 | 0.006   |
| <b>Medication</b>                      |                     |           |         |                          |           |         |
| Platelet inhibition                    | 2.55                | 1.32-4.92 | 0.005   | 3.03                     | 1.40-6.56 | 0.005   |
| Erythropoietin stimulating agent (ESA) | 2.56                | 1.32-4.95 | 0.005   | 3.03                     | 1.40-6.57 | 0.005   |

|                   |      |           |       |      |           |       |
|-------------------|------|-----------|-------|------|-----------|-------|
| ESA dose per week | 2.45 | 1.11-5.42 | 0.027 | 2.84 | 1.10-7.32 | 0.031 |
| Vitamin D         | 2.60 | 1.35-5.03 | 0.005 | 3.13 | 1.44-6.78 | 0.004 |
| ACE inhibitor     | 2.62 | 1.35-5.08 | 0.004 | 3.17 | 1.46-6.88 | 0.004 |

FT: final turbidity, AU: Arbitrary units, CRP: C-reactive protein, C3: complement C3, BMI: body mass index, BP: blood pressure, Data are presented as mean±SD or as a percentage for categorical data.

**Supplementary table 2. Clinical characteristics of matched patients with low and high levels of final turbidity (FT).**

| VARIABLE                  | Patients<br>(n = 40) | FT<0.32<br>(AU)<br>(n = 20) | FT≥0.32 (AU)<br>(n = 20) | P      |
|---------------------------|----------------------|-----------------------------|--------------------------|--------|
| Gender, n (m/f)           | 21/19                | 11/9                        | 10/10                    | 0.752  |
| Age (years)               | 57±11                | 56±12                       | 59±10                    | 0.424  |
| Dialysis vintage (years)  | 6.9±4.3              | 6.9±3.9                     | 6.9±4.7                  | 0.956  |
| Diabetes, n (%)           | 1 (2.5)              | 1 (0.5)                     | 0 (0)                    | 0.311  |
| Smokers, n (%)            | 12 (30)              | 5 (25)                      | 7 (35)                   | 0.490  |
| CRP (nmol/l)              | 7.50±8.75            | 7.54±10.04                  | 7.46±7.51                | 0.976  |
| Clot final turbidity (AU) | 0.333±0.143          | 0.199±0.036                 | 0.467±0.051              | <0.001 |

# Supplementary figure 1

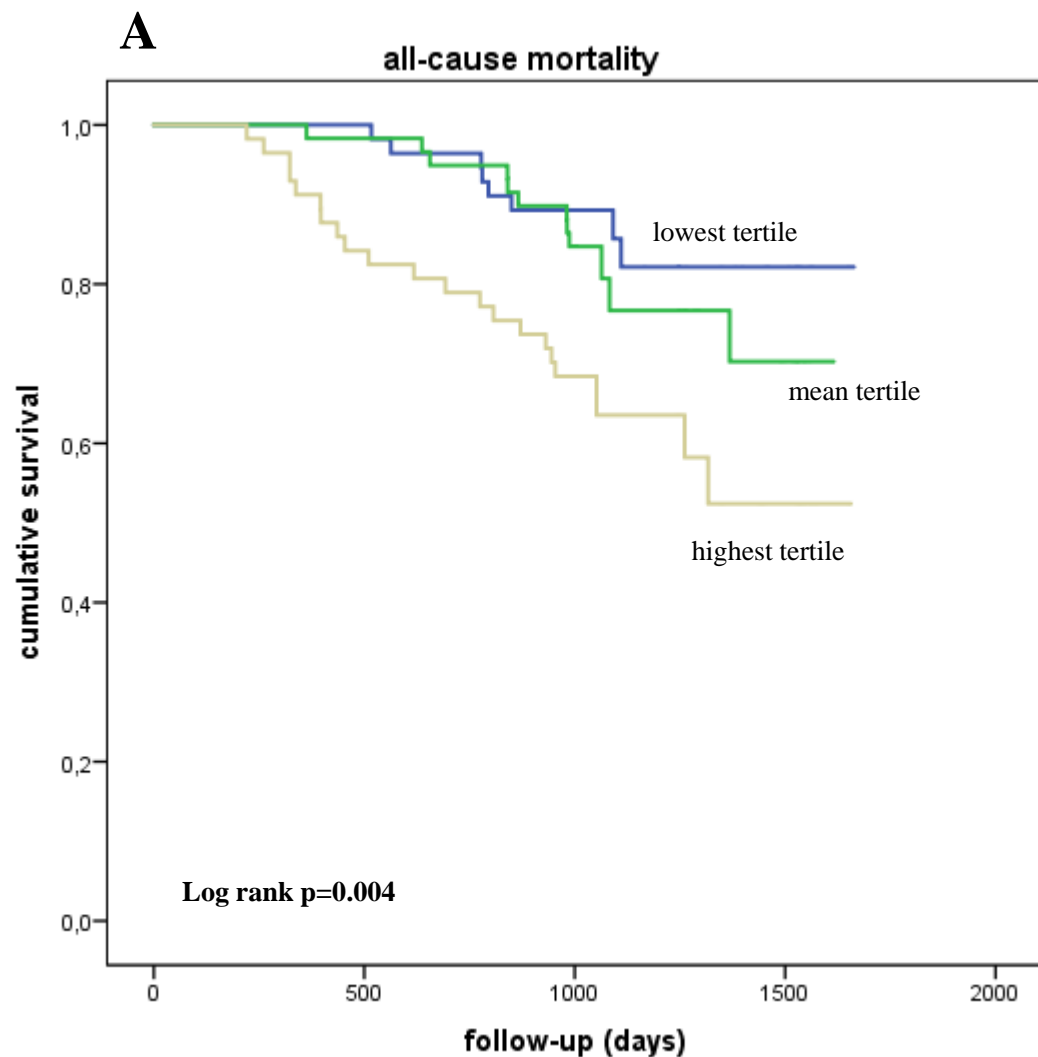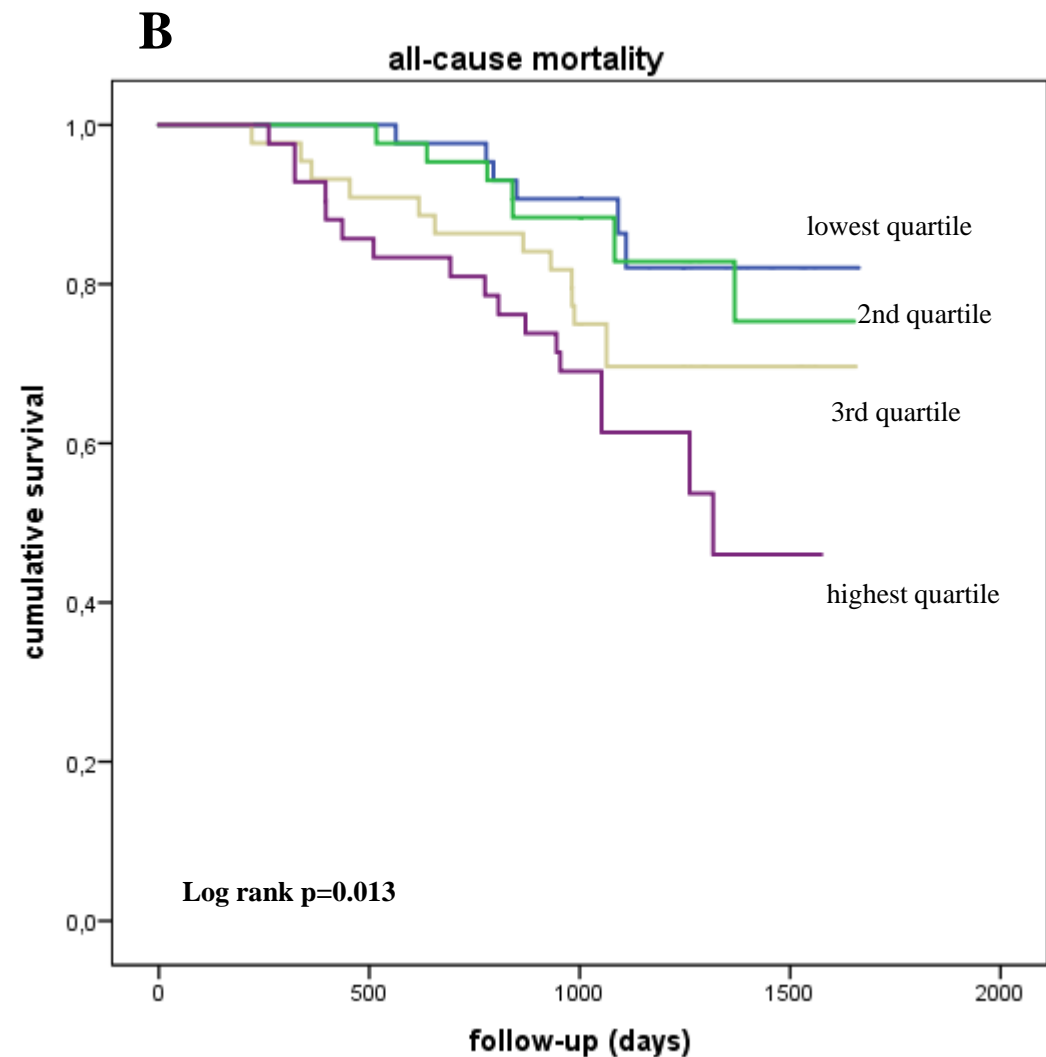

Supplementary figure 1. Higher clot density is associated with increased all-cause mortality in dialysis patients grouped according to tertiles and quartiles of clot density. Kaplan-Meier analysis of tertiles (A) and quartiles (B) of patients with different dense clot structure, log-rank test:  $P=0.004$  and  $p=0.013$ , respectively.

## Supplementary figure 2

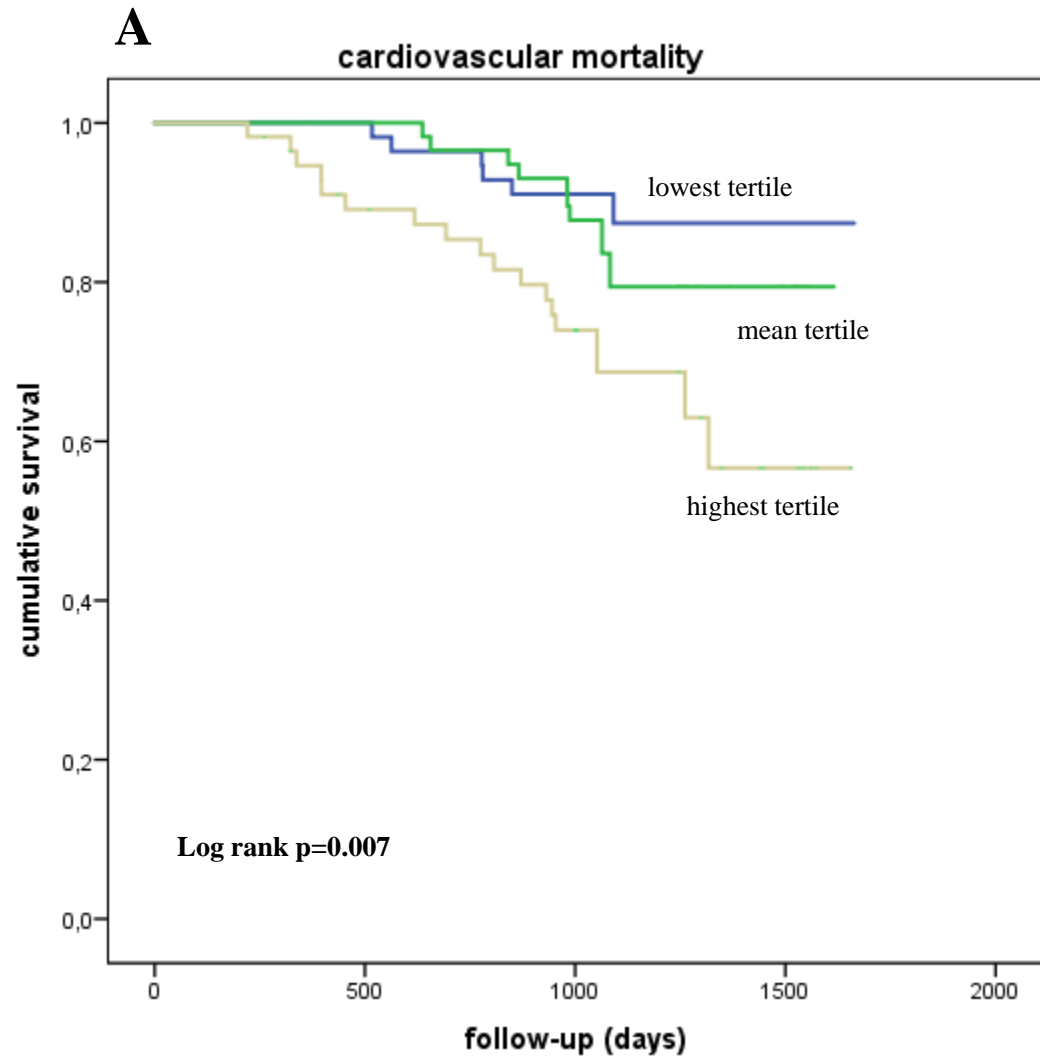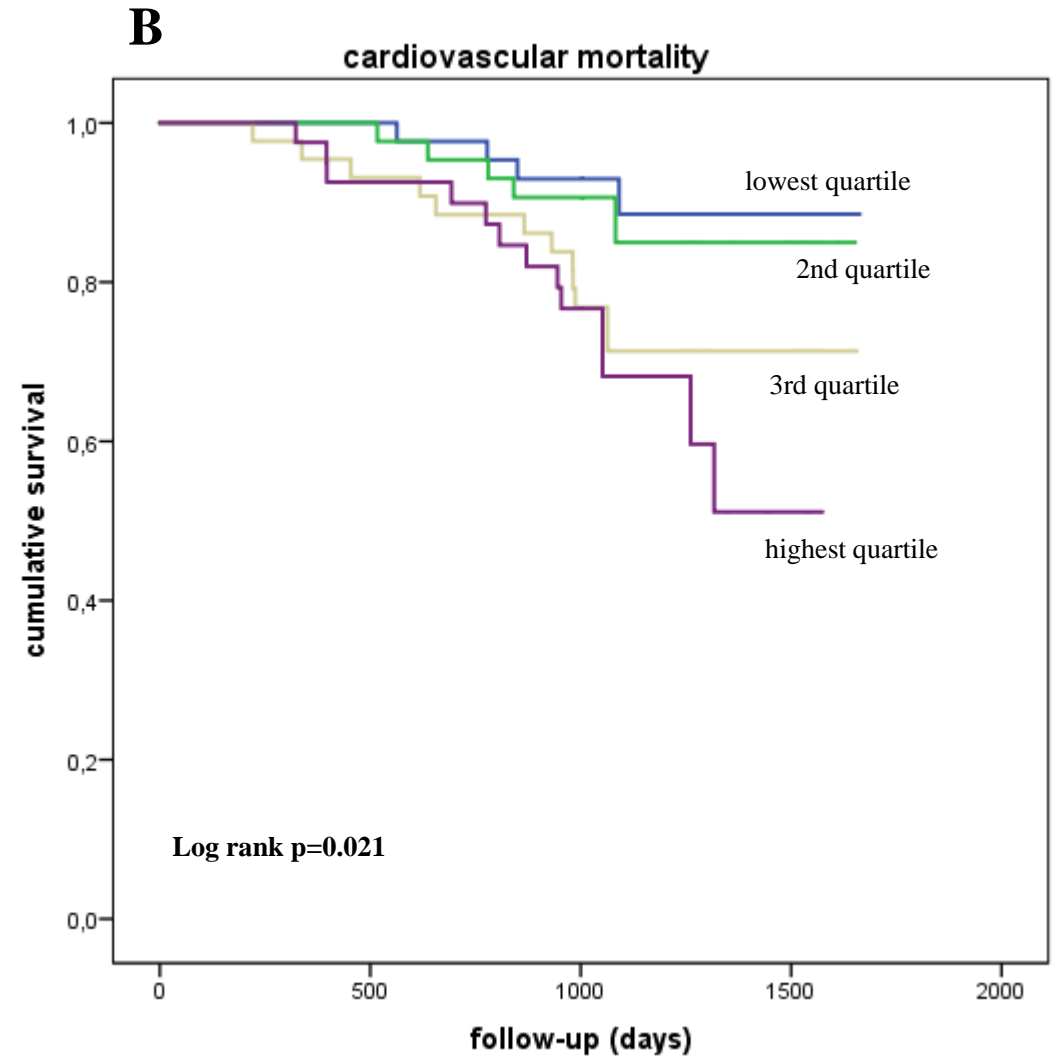

**Supplementary figure 2. Higher clot density is associated with increased cardiovascular mortality in dialysis patients grouped according to tertiles and quartiles of clot density.** Kaplan-Meier analysis of tertiles (A) and quartiles (B) of patients with different dense clot structure, log-rank test:  $P=0.007$  and  $p=0.021$ , respectively.

### Supplementary figure 3

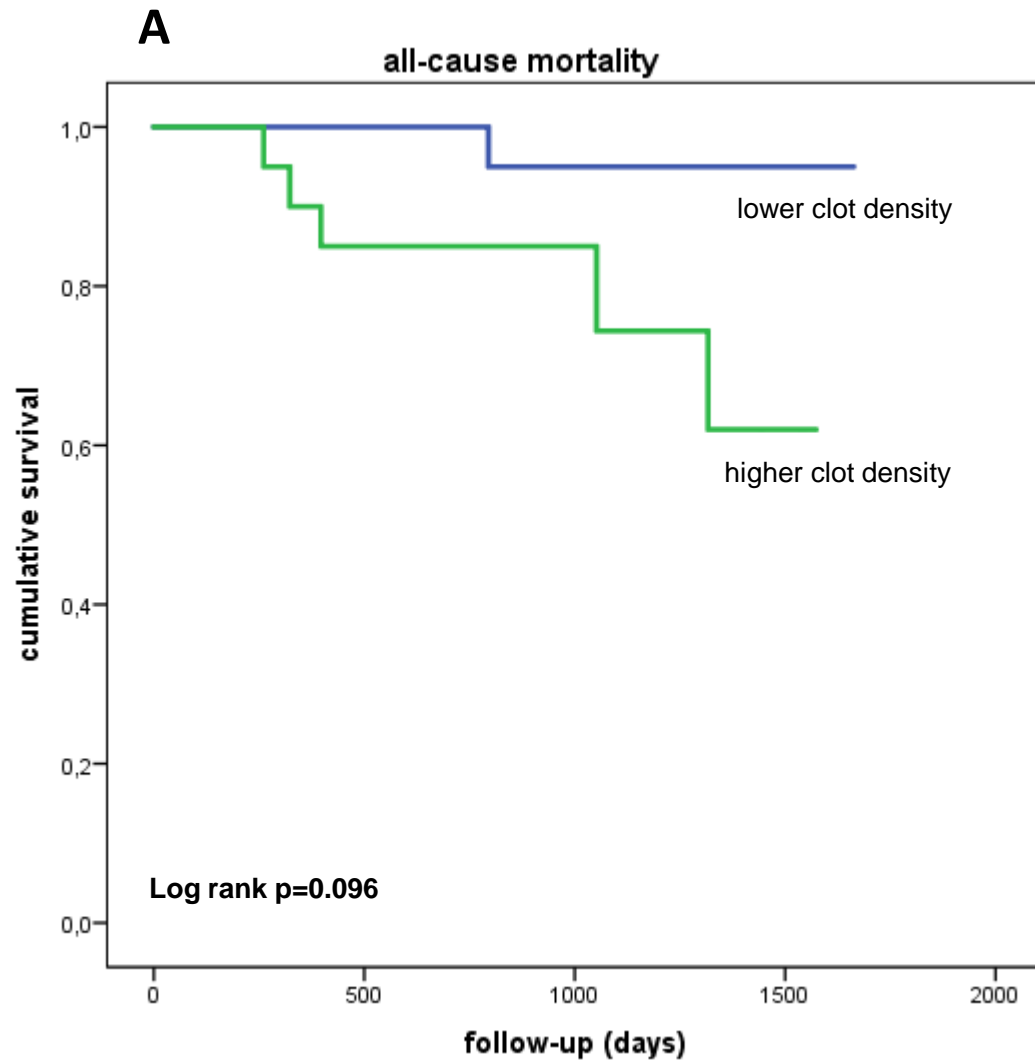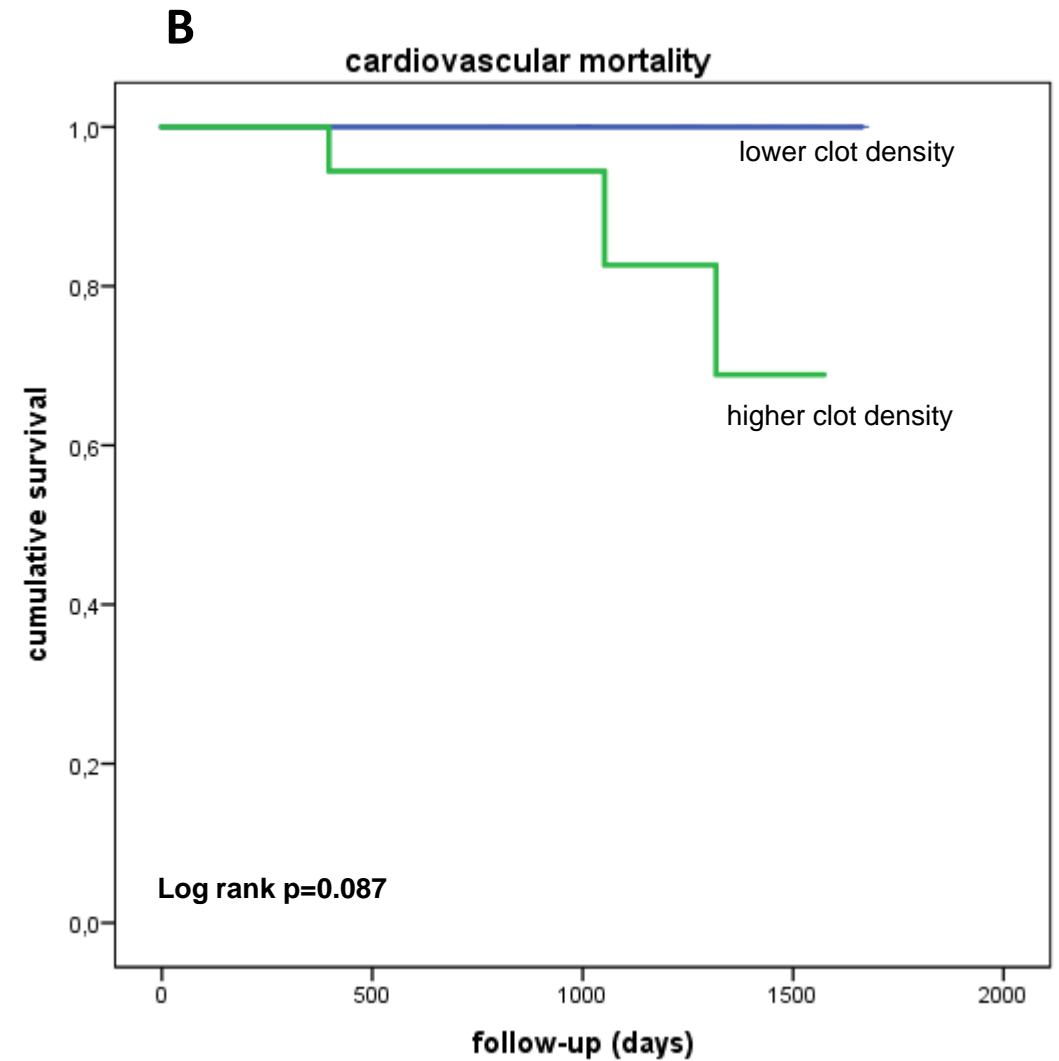

Supplementary figure 3. Higher clot density is associated with a tendency for increased all-cause and cardiovascular mortality in 40 matched patients. (A) All-cause and (B)cardiovascular mortality risk (log rank  $p=0.096$  and  $p=0.087$ , respectively). Kaplan-Meier analysis of 40 patients with denser or less dense clot structure (20 patients each group matched for CRP, gender, age, dialysis vintage, diabetes and smoking).

## Supplementary figure 4

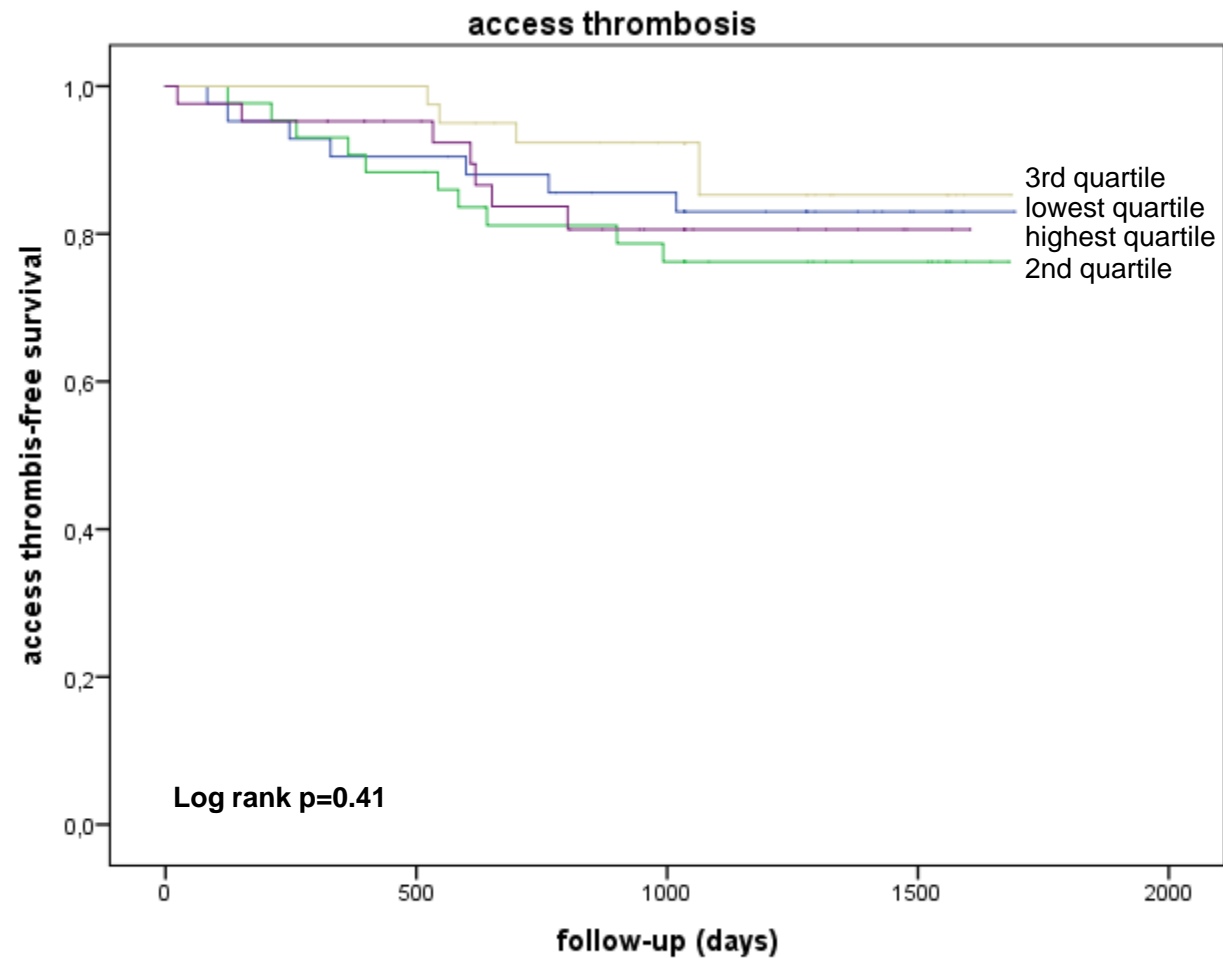

**Supplementary figure 4.** Clot density is not associated with vascular access thrombosis. Kaplan-Meier analysis of quartiles of patients with different dense clot structure, log rank test:  $p=0.41$ .
